# Supplementary material
Source: publisher figshare collection journal article supplement (https://tandf.figshare.com/ndownloader/files/13248173)
Supplement: Supplementary file 1 [file 13248173]

SUPPLEMENTAL TABLES AND FIGURES

Table S1. List of primers used in this study

| Descriptions and primers | | Sequence 5’ to 3’ |
| --- | --- | --- |
| *For amplification of the ad-3B gene* | | |
|  | 3B-L2 | GGCAAATCGGTTCCTGTTGAACTC |
|  | 3B-R2 | CTGTCAAGTCCGTCGAGGTGTGTT |
|  | 3B-L3 | CGCCTTCTCATCCAAGAAATCCAC |
|  | 3B-R3 | TTGCGGAAACTGGAATGAGGAACT |
|  | 3B-L2(2) | GTTTTAGCAAGGCGCAAGAC |
|  | 3B-R2(2) | AACGTAGCGTGCTCTTGACA |
|  | 3B-LK | CGGCAGTTGACTTGATTGACGT |
|  | 3B-RK | ATTCGTGCATACCAAGTGTGTCC |
| *For DNA sequencing of the ad-3B gene* | | |
|  | 3B-d1 | CTTGAGCATGAAGGGAAAGC |
|  | 3B-u2 | TATTCACAAGCCGCCTATCC |
|  | 3B-d2 | TCAATGGTGTAGTGGCCTGA |
|  | 3B-u3 | TGTCTGTGAGCAGGCTAGGA |
|  | 3B-d3 | AGAGCCCATCGTGACCAGTA |
|  | 3B-u4 | GCTGCTTCTGCTGAGCAACT |
|  | 3B-d4 | GCCACTGTCCGTGTTCTTTA |

Table S2. Summary of *ad-3B* mutations identified after high-LET ion beam and X-ray irradiation of wild-type *N. crassa*. (A) Ar-ion, (B) Fe-ion, and (C) X-ray

(A) Summary of *ad-3B* mutations identified following Ar-ion beam irradiation

|  | Position in the  *ad-3B* gene | | Sequence change  /*micro-homologies* | Amino acid change  /deletions size/insertions size |
| --- | --- | --- | --- | --- |
| Single mutations in *ad-3B* | | |  |  |
| Base substitution | |  |  |  |
|  | | 379 | CagTag | GlnStop |
|  | | 887 | GA | First base of intron I |
|  | | 957 | tCgtAg | SerStop |
| Deletions | |  |  |  |
|  | | 514-515 | *T* | −1 bp |
|  | | 983-995 | *CT* | −13 bp |
|  | | 1443-1444 | cggATcag | −2 bp |
|  | | 1872-1877 | *T* | −6 bp |
|  | | 1903 | cccTcag | −1 bp |
| Insertions | |  |  |  |
|  | | 639 | ggctccggcAtcc | +1 bp |
|  | | 1640 (1641, 1642) | ggtggaggtGgga | +1 bp |
| Multiple mutations in *ad-3B* (Clone #) | | |  |  |
| Ar22-100-2-13 | | −22-35 | atcTGCTCGGAAGcag | −57 bp |
|  | | 1917 | agcAtat | −1 bp |
| Ar22-100-1-2 | | 361, 363 | tggAgAacttgggCact | −1 bpa, 1 nucleotide changeb |
|  | | 1455–1457 | *T* | −3 bp |
| Ar-5 | | 1212–1213 | *T* | −2 bp |
|  | | 1287–1288 | *T* | −1 bp |
| Ar22-100-1-23 | | 1888 | ttGttT | LeuPhe |
|  | | 1889 | GgcTgc | GlyCys |
|  | | 1890–1914 | *G* | −25 bp |

Mutation positions in the *ad-3B* gene are indicated by numbers. Base alterations are designated using capitals. Missense and nonsense mutations are indicated using amino acid characters or “stop”. Deletion and insertion sizes are indicated using “−” and “+”, respectively, followed by the bp number. For multiple mutations, deletions/insertions are designated using capitals without underline while nucleotide changes are designated using capitals with underline.

(B) Summary of *ad-3B* mutations identified following Fe-ion irradiation

|  | Position in the  *ad-3B* gene | Sequence change  / *micro-homologies* | Amino acid change  / deletion or insertion size |
| --- | --- | --- | --- |
| Single mutation in *ad-3B* | |  |  |
| Base substitution |  |  |  |
|  | 1068 | tTgtAg | LeuStop |
|  | 1538 | GcgCcg | AlaPro |
|  | 1650 | cAtcGt | HisArg |
|  | 1869 | cTtcCt | LeuPro |
|  | 1893 | tCctAc | SerTyr |
|  | 1942 | atGatT | MetIle |
| Deletions |  |  |  |
|  | −1563-2219 | *G* | −3782 bp |
|  | −1446-1946 | gacGCTCCGGAGGagg | −3392 bp |
|  | −715-2102 | aggGTCGGCAACTtgc | −2817 bp |
|  | 18–117 | *ATC* | −100 bp |
|  | 329–374 | *C* | −46 bp |
|  | 340–341 | *C* | −1 bp |
|  | 403–412 | *AC* | −10 bp |
|  | 624–625 | *C* | −2 bp |
|  | 834–841 | tagTACCTTGTgggg | −8 bp |
|  | 842–846 | tgtGGGGAagg | −5 bp |
|  | 1008–1016 | *CC* | −8 bp |
|  | 1027–1541 | ttaCATGTTGCGCtcg | −515 bp |
|  | 1326–1328 | *A* | −1 bp |
|  | 1334 | agaGagg | −1 bp |
|  | 1432–1434 | *A* | −1 bp |
|  | 1455–1457 | *T* | −3 bp |
|  | 1462 | ggtCacg | −1 bp |
|  | 1723 | cgaCgga | −1 bp |
| Multiple mutations in *ad-3B* (Clone #) | |  |  |
| Fe25-100-10-1 | 53 | gGcgTc | GlyVal |
|  | 204 | ggtCaagggtaag | −1 bp |
| Fe25-100-6-1 | 294, 295 | aaTGgcaaAgc, *G* | 1 nucleotide changeb, −1 bpa |
| Fe25-200-12-1 | 347, 350 | ctaTccAtccctaccCtcc | −1 bpa, 1 nucleotide changeb |
| Fe25-200-1-1 | 637–676 | tggGCTCCTCGTActg | −40 bp |
|  | 980–1056 | *C* | −77 bp |
| Fe18-150-2-1 | 826, 828 | gatGtGattgattatt | −1 bp, −1 bp |
| Fe18-150-1-4 | 1263, 1265–1266 | ctgaCaGGactgaaa, *G* | −1 bp, −2 bp |

Mutation positions of the nucleotide in the *ad-3B* gene are indicated using numbers. Base alterations are designated using capitals. Missense and nonsense mutations are indicated using amino acid character or “stop.” Size of deletion and insertion are indicated using “−” and “+”, respectively. Multiple mutations are shown as above. Deletion/insertion are designated using capitals without underline. Nucleotide changes are designated using capitals with underline.

(C) Summary of the *ad-3B* mutations identified following X-ray irradiation

|  | | | | |
| --- | --- | --- | --- | --- |
|  | Position in the  *ad-3B* gene | | Sequence change  /*micro-homologies* | Amino acid change  /deletions size/insertions size |
| Single mutation in *ad-3B* | | |  |  |
| Base substitution | |  |  |  |
|  | | 307 | AagTag | LysStop |
|  | | 887 | GA | First base of intron I |
|  | | 1533 | cCgcAg | ProGln |
|  | | 1611 | gGcgTc | GlyVal |
|  | | 1637 | GgtCgt | GlyArg |
|  | | 1692 | aTtaCt | IleThr |
|  | | 1880 | AggTgg | ArgTrp |
| Deletions | |  |  |  |
|  | | 248–250 | *A* | −1 bp |
|  | | 381–382 | *G* | −1 bp |
|  | | 508–510 | *T* | −1 bp |
|  | | 508–510 | *T* | −1 bp |
|  | | 508–510 | *T* | −1 bp |
|  | | 508–510 | *T* | −1 bp |
|  | | 532–533 | *A* | −1 bp |
|  | | 646 | ttcGtga | −1 bp |
|  | | 800 | gtgAgca | −1 bp |
|  | | 1022–1023 | *C* | −1 bp |
|  | | 1393 | tagTaac | −1 bp |
|  | | 1496–1497 | *A* | −1 bp |
|  | | 1534–1535 | ccGTat | −2 bp |
|  | | 1655–1656 | *C* | −1 bp |
|  | | 1711–1729 | ggcAACACGACTTgac | −19 bp |
| Multiple mutations in *ad-3B* (Clone #) | | |  |  |
| X6-200-1-8 | | 662 | gTcgCc | ValAla |
|  | | 1924 | gagtaggagTtag | +1 bp |
| X6-300-2-3 | | 727, 731 | gttGagaCcatgttTagaGcat | 1 nucleotide change,  1 nucleotide change |
| X6-300-1-6 | | 1107, 1109 | cttCtAtcatcttttcat | −1 bp, −1 bp |

Mutation positions of the nucleotide in the *ad-3B* gene are indicated using numbers. Base alterations are designated using capitals. Missense and nonsense mutations are indicated using amino acid character or “stop.” Size of deletion and insertion are indicated using “−” and “+”, respectively. Multiple mutations are showed as same to above. Deletion/insertion are designated using capitals without underline. Nucleotide changes are designated using capitals with underline.

Table S3. LET values and particle numbers of high-LET ion beams and X-rays

| Ion species | LET (keV/µm) | Dose (Gy) | Particle numbersa | Dose rate (Gy/sec) |
| --- | --- | --- | --- | --- |
| X-ray | 2 | 1 | NAb | 0.05 |
| C-ion | 30 | 1 | 20.8 | 2.2±0.5 |
| Ar-ion | 287 | 1 | 2.2 | 1.2±0.2 |
| Fe-ion | 643±2 | 1 | 1.0 | 2.0±0.3 |

a NA: not applicable.

b Particle numbers that pass through a cell nucleusof ion beams and X-ray were calculated using the formula D × ρ × 6.25 × 102 ÷ LET, where D, and ρ represent the dosage and the target density, respectively.

Figure S1

Figure S1. Survival curves of *Neurospora* wild-type (closed circles), *mus-52* (closed squares), and *mei-3* (open triangles) strains after irradiation by C-ion beam. Bars indicate standard error calculated from three independent irradiations. This figure is reprinted from (Ma *et al*. 2013) with permission from Elsevier.

Figure S2.


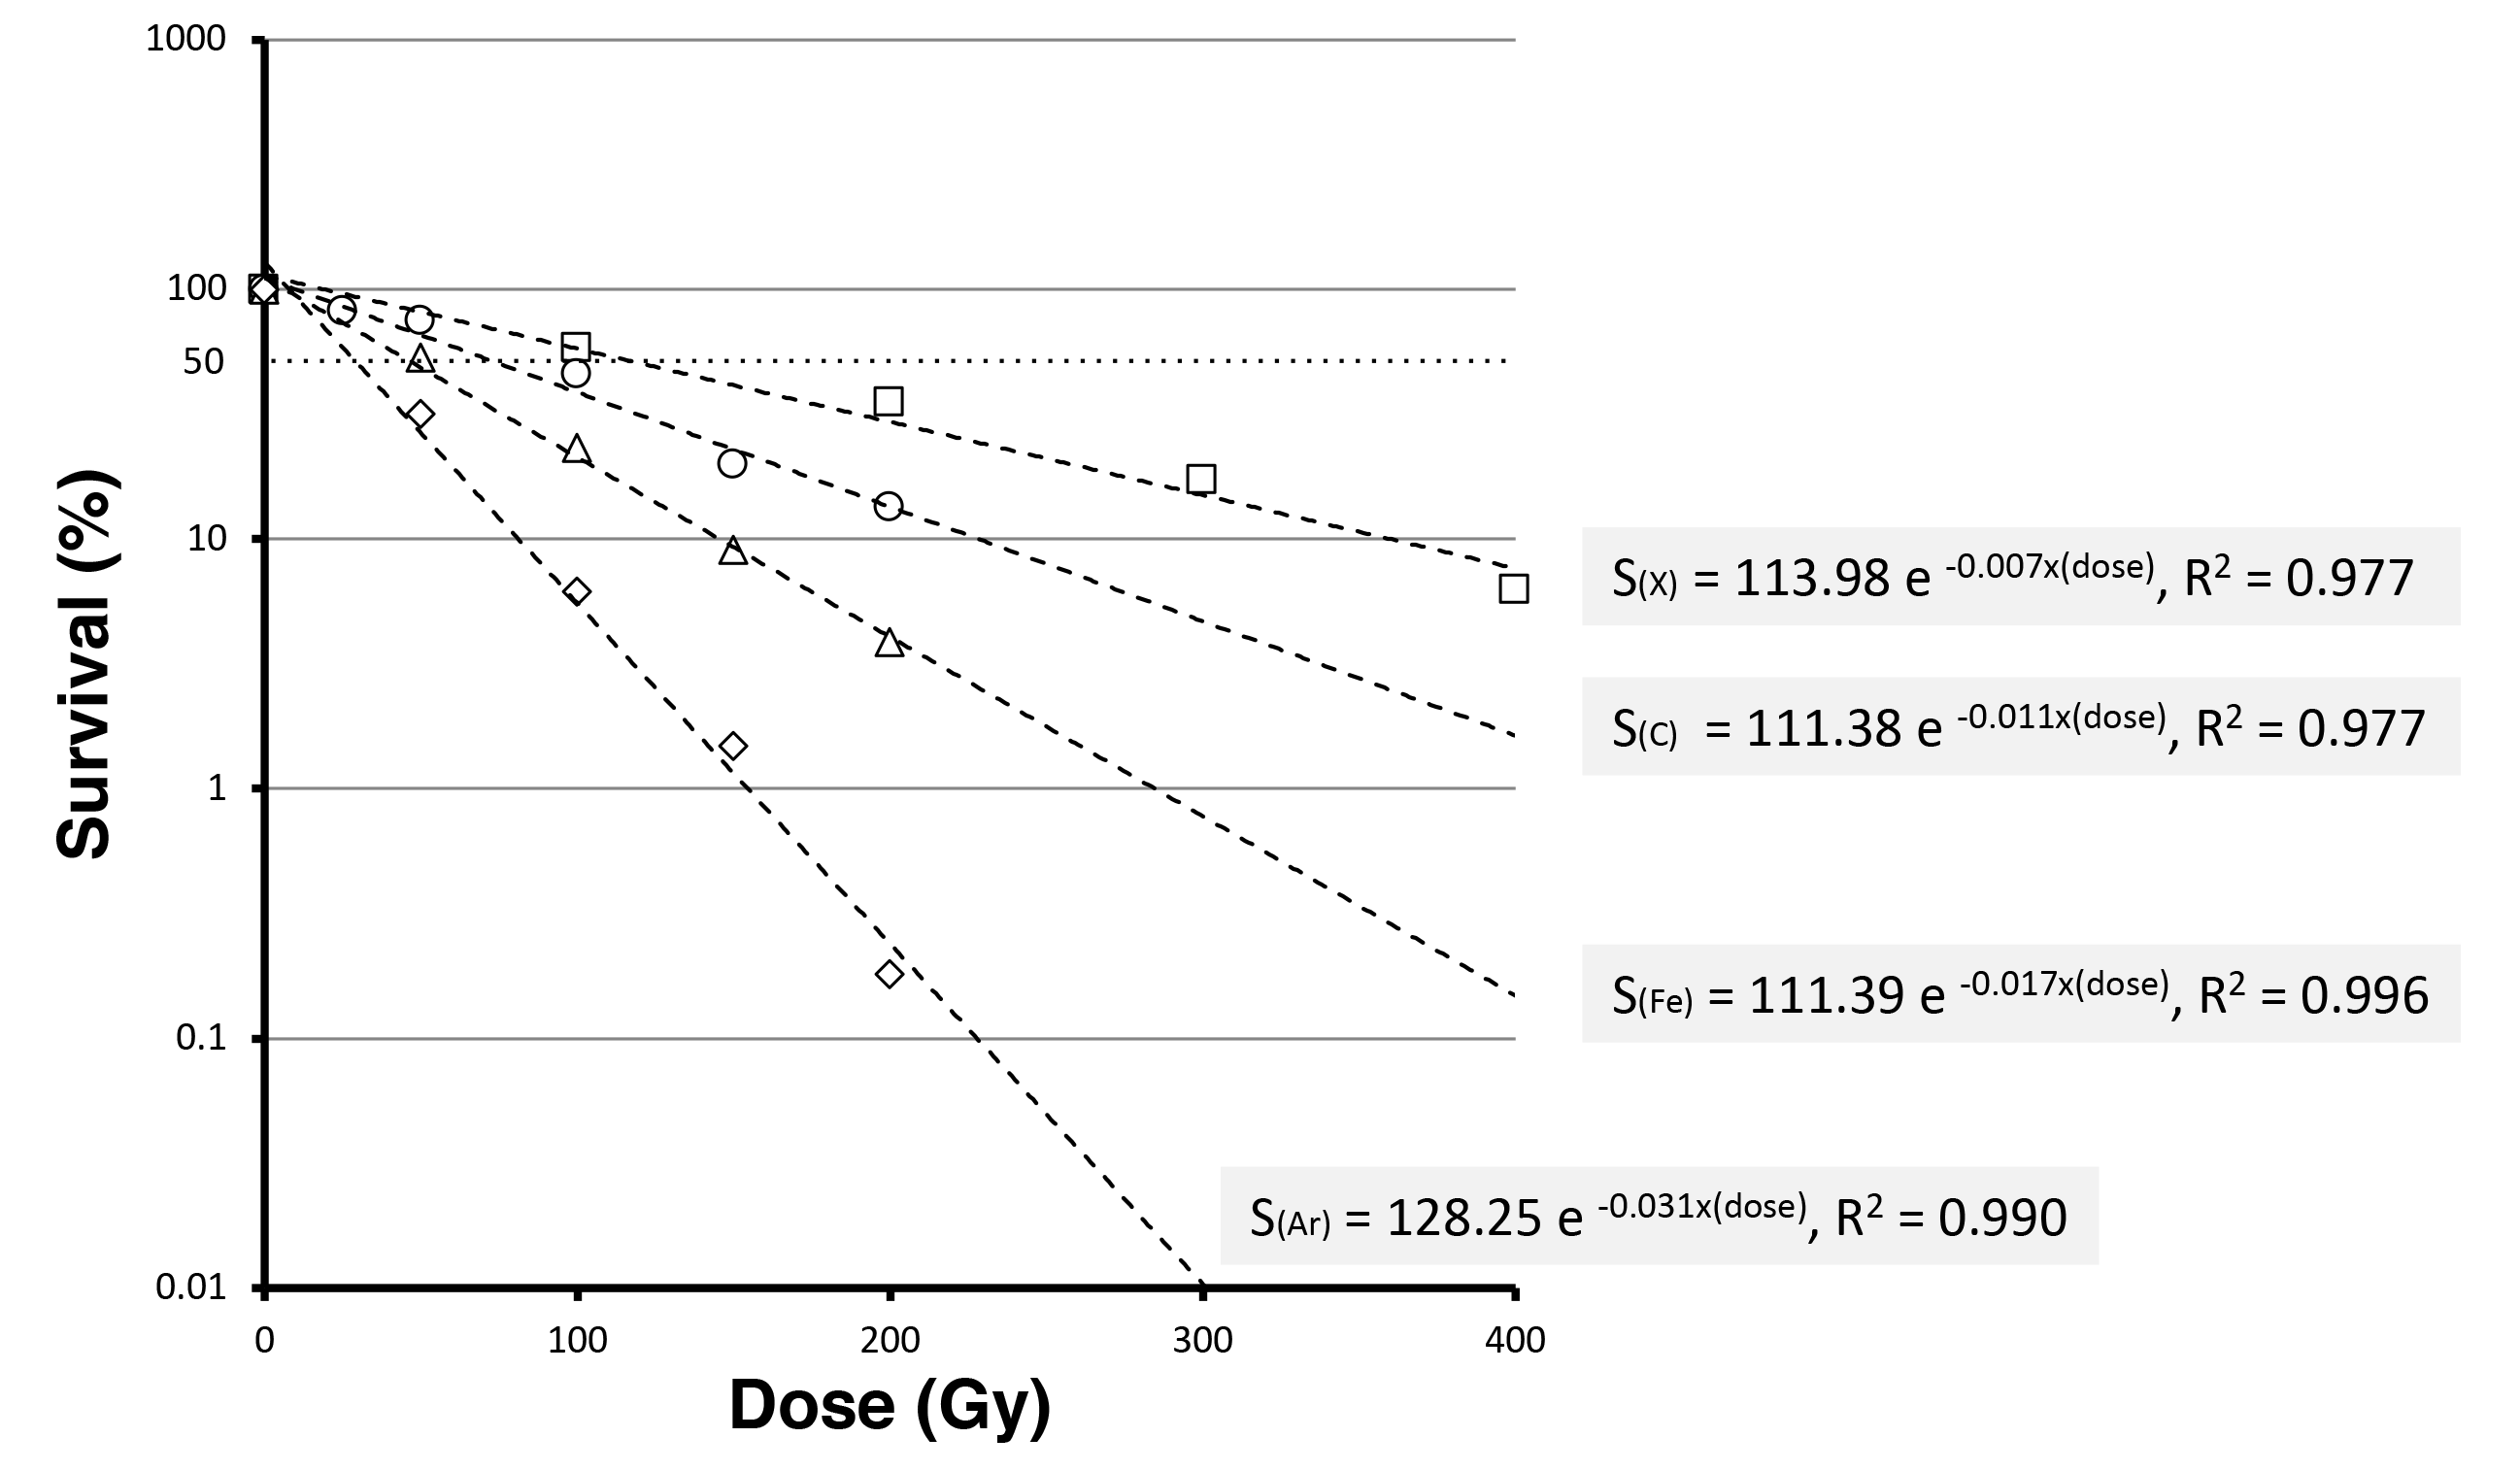


Figure S2. Curve fitting of survival curves of the *mei-3* strain after X-ray (open squares), *C-ion (open circles), Fe-ion (open triangles), and Ar-ion (open diamonds) beam irradiation were fitted by an exponential regression curve. The value for the correlation coefficient (R2) for each curve was greater than 0.977. Doses allowing 50% survival for X-ray, C-ion, Fe-ion, and Ar-ion irradiation was calculated as 80, 64, 47 and 27, respectively. RBE values of C-ion, Ar- ion and Fe-ion irradiation of the *mei-3* strain is calculated as 1.2, 3.0, and 1.7, respectively.

*Survival curve of the *mei-3* strain to C-ion beam irradiation obtained our previous study, reprinted from (Ma *et al*. 2013) with permission from Elsevier.

Figure S3.


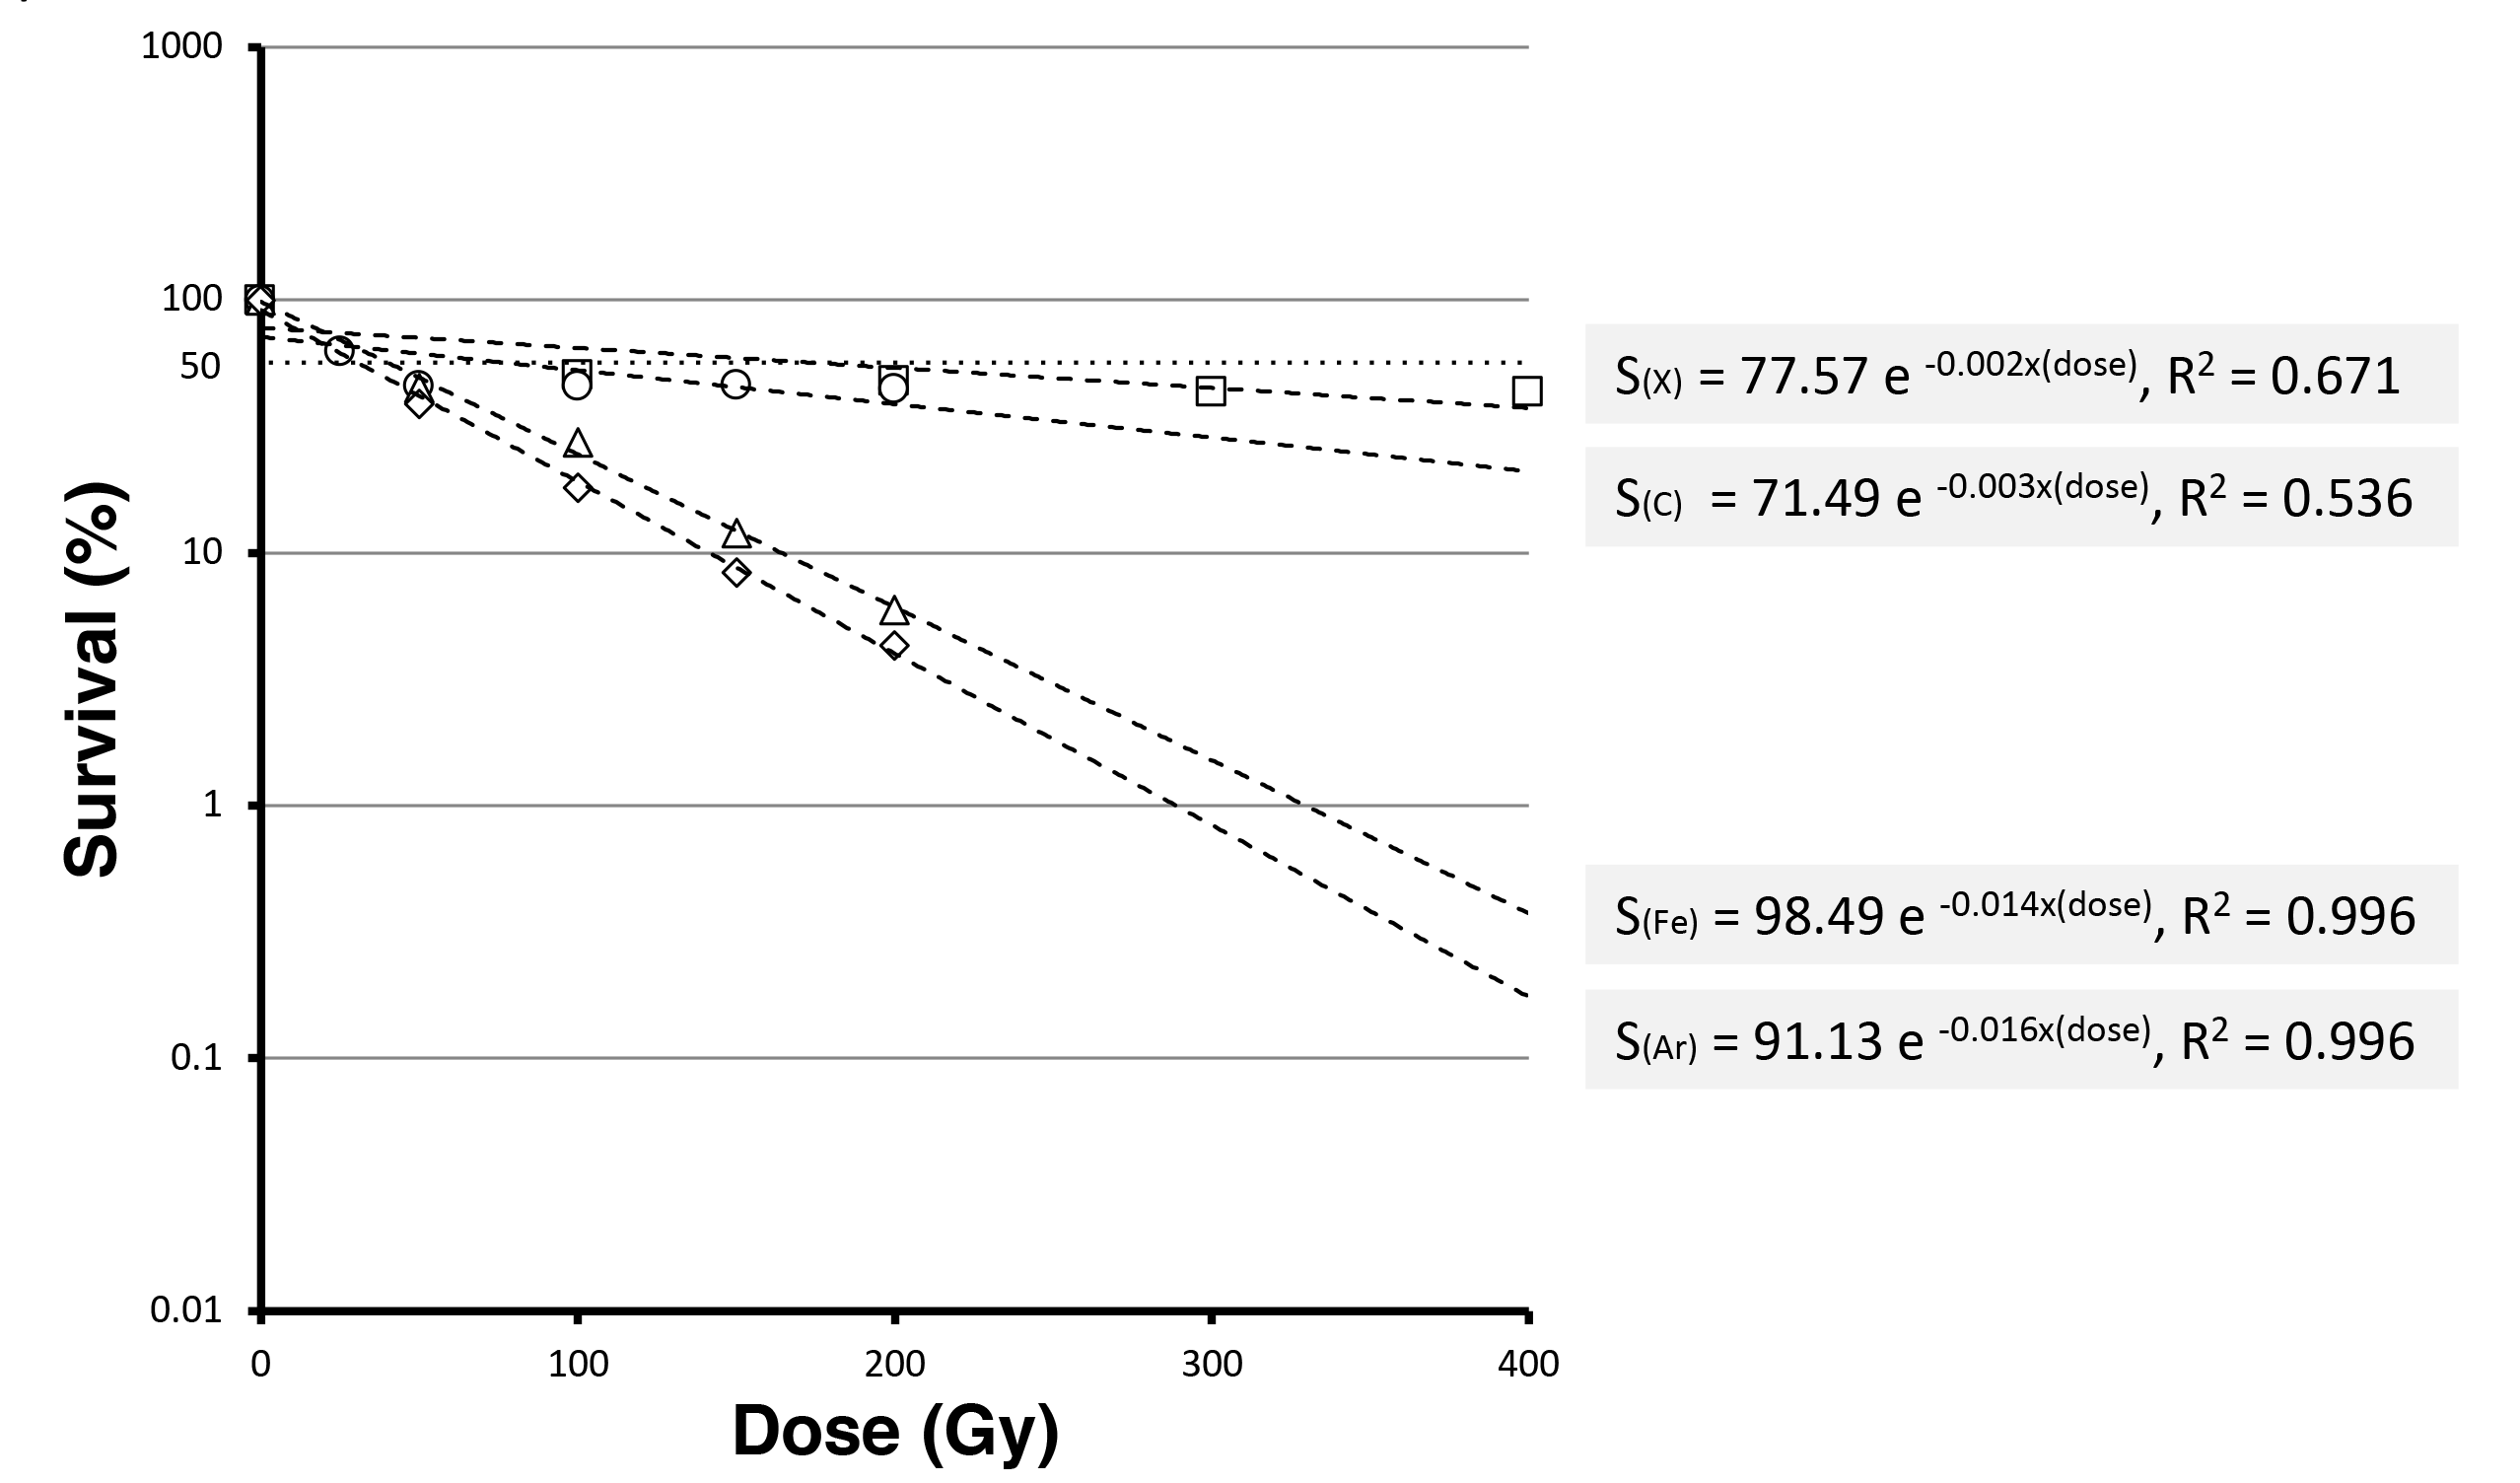


Figure S3. Curve fitting of survival curves of the *mus-52* strain after X-ray (open squares), *C-ion (open circles), Fe-ion (open triangles), and Ar-ion (open diamonds) beam irradiation were fitted by an exponential regression curve. Approximate curves for Fe-ion and Ar-ion showed good correlations (R2 = 0.996), although exponential regression analysis of X-ray and C-ion survival curves indicated low correlation (R2 < 0.671). Doses allowing 50% survival for X-ray, C-ion, Fe-ion, and Ar-ion irradiation was calculated as 70, 62, 49 and 41, respectively.

*Survival curve of the *mus-52* strain to C-ion beam irradiation obtained our previous study, reprinted from (Ma *et al*. 2013) with permission from Elsevier.

Figure S4.

-461

1

886

954

1759

1817

2026

X-ray

Ar-ion

Fe-ion

-461

1

886

954

1759

1817

2026

-461

1

886

954

1759

1817

2026

Figure S4. Graphical image of mutation types and sites induced by high-LET ion beams and X-ray irradiation in *N. crassa.* Numbers indicate nucleotide positions with “1” for the coding sequence start site of the *ad-3B* gene. Open boxes represent 100-bp spans. Base substitutions (open triangles) and deletions/insertions (close triangles) are represented above and below the solid line, respectively.

Figure S5.

Figure S5. Mutation frequency as measured by forward mutations at the *ad-3* loci for wild-type (closed circles), *mus-52* (closed squares), and *mei-3* (open triangles) strains following C-ion beam irradiation. Bars indicate standard error calculated from three independent irradiations. This figure is reprinted from (Ma *et al*. 2013) with permission from Elsevier.
